# Supplementary material for: SnSb–ZnO composite materials as high performance anodes for lithium-ion batteries
Source: Royal Society of Chemistry journal article supplement (doi:10.1039/c5ra21449a), 2015-01-01
Supplement: c5ra21449a1.pdf [file c5ra21449a1.pdf]

## **SnSb-ZnO Composite Materials as High Performance Anodes for Lithium-ion Batteries**

Yongliang Li, Wei Zhang, Huihua Cai, Jingwei Wang, Xiangzhong Ren\*, Peixin Zhang

(School of Chemistry and Environmental Engineering, Shenzhen University, Shenzhen,

Guangdong, P.R. China, 518060)

\*Corresponding author: Renxiang Zhong, Tel & Fax: 86-755-26558134, Email: renxz@szu.edu.cn

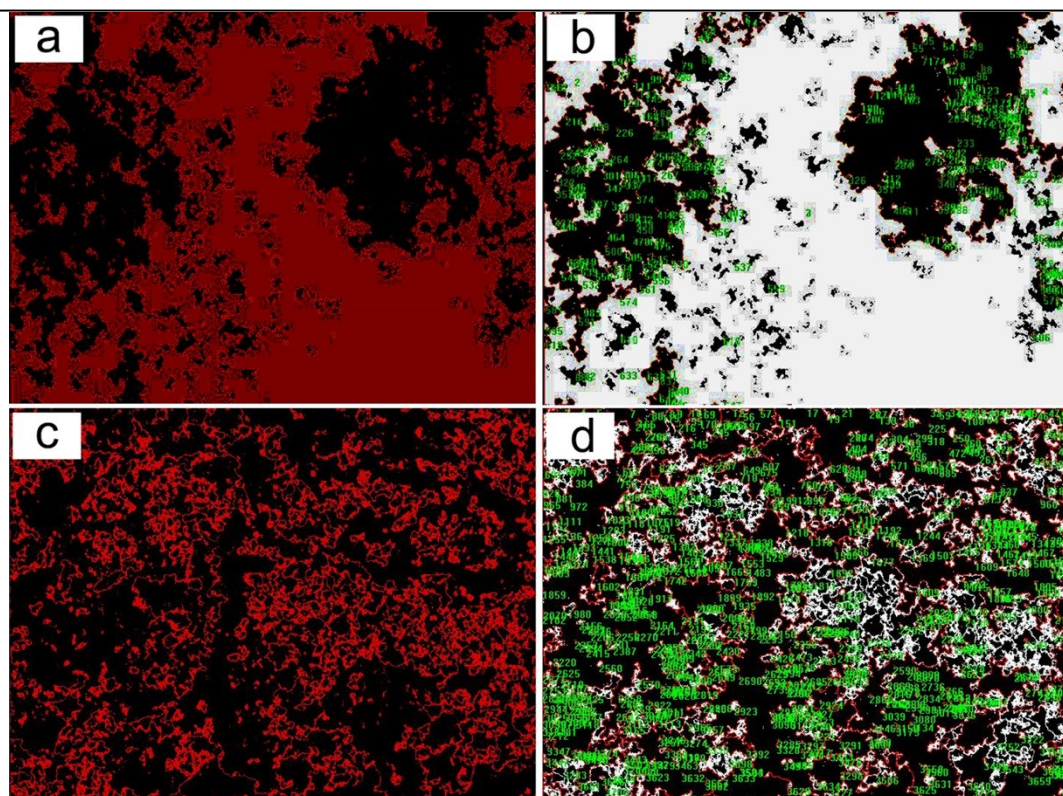

Figure S1 The porosity analysis images of SnSb (a and b) and SnSb-(ZnO)<sub>0.4</sub> (c and d) composite material.

Table S1 The Impedance parameters of SnSb and SnSb-(ZnO)<sub>0.4</sub> electrodes

after different cycles.

|                           |                  | 10th   | 50th   | 100th  |
|---------------------------|------------------|--------|--------|--------|
| SnSb                      | $R_s(\Omega)$    | 7.58   | 10.12  | 14.53  |
|                           | $R_{ct}(\Omega)$ | 310.11 | 404.81 | 457.8  |
| SnSb-(ZnO) <sub>0.4</sub> | $R_s(\Omega)$    | 6.07   | 6.28   | 6.35   |
|                           | $R_{ct}(\Omega)$ | 209.42 | 313.94 | 393.73 |
